# Supplementary material for: S-Carvone Formulation Based on Granules of Organoclay to Modulate Its Losses and Phytotoxicity in Soil
Source: MDPI journal article supplement (doi:10.3390/agronomy11081593), 2021-08-11
Supplement: s1 [file s1]

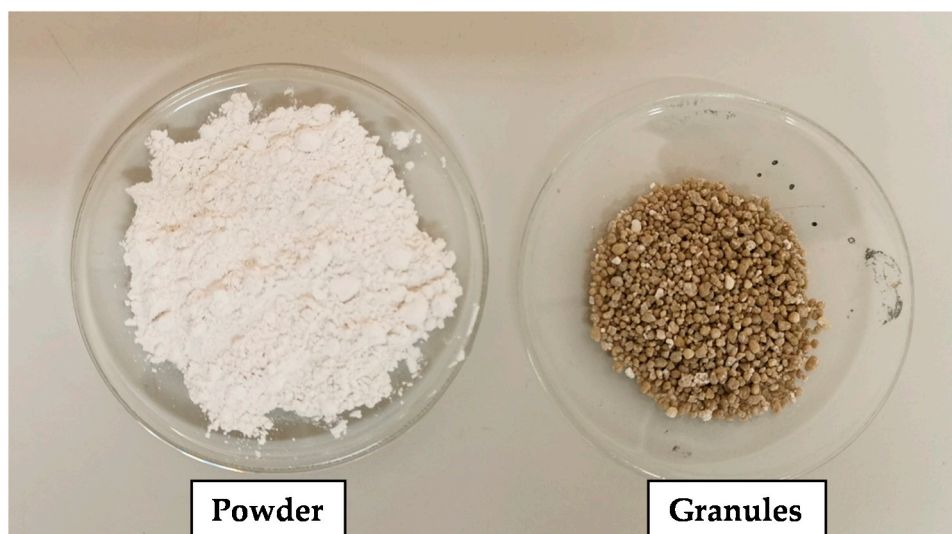

**Figure S1.** Photograph of powder (left) and granules (right) of Cloisite 10A®

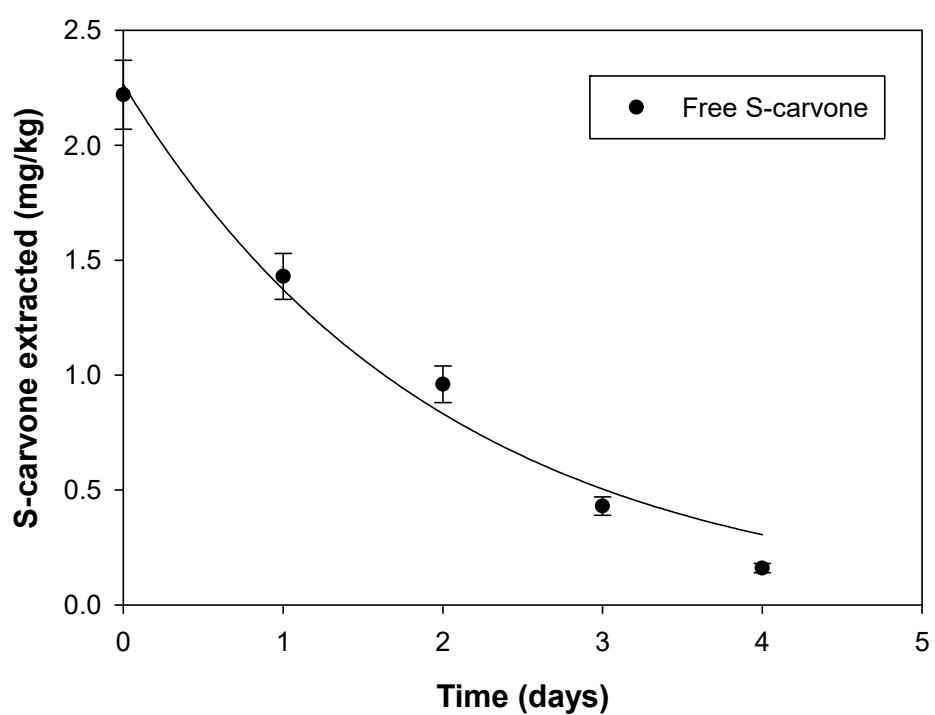

**Figure S2.** Dissipation curves for S-carvone applied to soil as free compound at an application dose of 2 mg/kg. Symbols represent experimental data whereas the line correspond to the fitting to single first-order dissipation kinetics. Error bars correspond to standard errors of triplicate measurements.

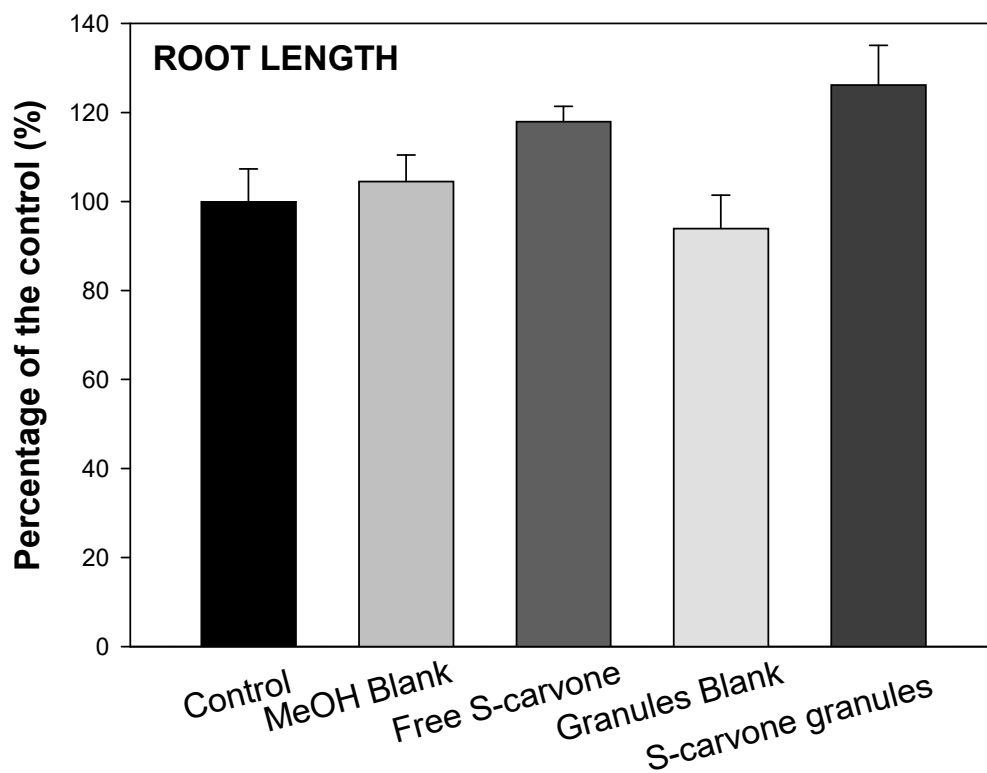

**Figure S3.** Effect of S-carvone applied to soil as free compound or supported on granules on root length of *Lactuca Sativa* L. Data (means and standard errors for n = 3) correspond to 7 days after treatment.

**Table S1.** Total amount of S-carvone (%) remaining in flasks containing the allelochemical in a free and granulated form after 7 days of exposure to air<sup>1</sup>.

|                                               | Control<br>(%) | Free<br>(%) | Granulated<br>(%) |
|-----------------------------------------------|----------------|-------------|-------------------|
| Amount of S-carvone remaining in<br>the flask | 90.5 ± 2.6     | 30.9 ± 2.3  | 42.0 ± 1.5        |

<sup>1</sup> Each flask contained 0.5 mg of allelochemical and 20 mL of water. **Control:** sealed flasks containing 0.5 mg of S-carvone dissolved in 20 mL of water; **Free:** open flasks containing 0.5 mg of S-carvone dissolved in 20 mL of water; **Granulated:** open flasks containing 17 mg of granules (0.5 mg of S-carvone) suspended in 20 mL of water.
